# Supplementary material for: Genetic and morphological evidence for introgression between three species of willows
Source: BMC Evol Biol. 2015 Sep 16;15:193. doi: 10.1186/s12862-015-0461-7 (PMC4574262; doi:10.1186/s12862-015-0461-7)
Supplement: Additional file 1: — Collected samples and classification. (XLSX 14 kb) [file 12862_2015_461_MOESM1_ESM.xlsx]

## Sheet: Sheet1
Additional file 1. Collected samples and classification
Sample	Classification based on the morphological data
C1	S. viminalis
C2	S. viminalis
С3	S. viminalis
С4	S. dasyclados
C5	S. viminalis
C6	S. viminalis
C7	S. viminalis
C8	S. viminalis
C9	S. viminalis
C10	S. viminalis
C11	S. viminalis
C12	S. viminalis
C13	S. viminalis
C14	S. viminalis
C15	S. viminalis
C16	S. viminalis
C17	S. viminalis
C18	S. viminalis
C19	S. viminalis
C21	S. viminalis
C22	S. viminalis
C23	S. viminalis L. x S. schwerinii E. Wolf
C24	S. viminalis
C25	S. viminalis
C26	S. viminalis
C27	S. viminalis L. x S. schwerinii E. Wolf
C28	S. viminalis
C29	S. viminalis
C30	S. viminalis
D1	S. schwerinii
D2	S. schwerinii
D3	S. schwerinii
D4	S. schwerinii
D5	S. schwerinii
D6	S. schwerinii
D7	S. schwerinii
D8	S. schwerinii
D9	S. schwerinii
D10	S. schwerinii
D11	S. schwerinii
D12	S. schwerinii
D13	S. schwerinii
D14	S. schwerinii
D15	S. schwerinii
D16	S. schwerinii
D17	S. schwerinii
D18	S. schwerinii
D19	S. schwerinii
D20	S. schwerinii
D21	S. schwerinii
D22	S. schwerinii
D23	S. schwerinii
D24	S. schwerinii
D25	S. schwerinii
H1	S. schwerinii
H2	S. schwerinii
H3	S. schwerinii
H4	S. schwerinii
H5	S. schwerinii
H6	S. schwerinii
H7	S. schwerinii
H8	S. schwerinii
H9	S. schwerinii
H10	S. schwerinii
H11	S. schwerinii
H12	S. schwerinii
H13	S. schwerinii
H14	S. schwerinii
H15	S. schwerinii
H16	S. schwerinii
H17	S. schwerinii
H18	S. schwerinii
H19	S. schwerinii
H20	S. schwerinii
H21	S. schwerinii
H22	S. schwerinii
H23	S. schwerinii
H24	S. schwerinii
H25	S. schwerinii
H26	S. schwerinii
H27	S. schwerinii
H28	S. schwerinii
H29	S. schwerinii
H30	S. schwerinii
I2	Info missing
I3	S. viminalis
I6	Info missing
I10	S. viminalis
I11	S. viminalis
I12	S. viminalis
I13	S.viminalis
I15	S. viminalis
I16	S. viminalis
I17	S. viminalis
I18	S. viminalis
I19	S. viminalis
I20	S. viminalis
I21	S. viminalis
I22	S. viminalis
I23	S. viminalis
I24	S. viminalis
I25	S. viminalis
I26	S. viminalis
I27	S. viminalis
I28	S. viminalis
I29	S. viminalis
I30	S. viminalis
I31	S. viminalis
I32	S. viminalis
Ki1	S. schwerinii
Ki2	S. schwerinii
Ki3	S. schwerinii
Ki4	S. schwerinii
Ki5	S. schwerinii
Ki6	S. schwerinii
Ki7	S. viminalis L. x S. schwerinii E. Wolf
Ki8	S. schwerinii
Ki9	S. schwerinii
Ki 10	S. viminalis
Ki 11	S. schwerinii
Ki12	S. schwerinii
Ki13	S. schwerinii
Ki14	S. viminalis
Ki15	S. schwerinii
Ki16	S. schwerinii
Ki17	S. viminalis
Ki18	S. schwerinii
Ki19	S. schwerinii
Ki20	S. schwerinii
Ki21	S. schwerinii
Ki22	S. dasyclados
Ki23	S. schwerinii
Ki24	S. schwerinii
Ki25	S. schwerinii
Ki26	S. dasyclados
Ki27	S. viminalis
Ki28	S. schwerinii
Ki29	S. schwerinii
Ki30	S. viminalis
Ku1	S. viminalis
Ku2	S. schwerinii
Ku3	S. viminalis
Ku4	S. viminalis
Ku5	S. schwerinii
Ku6	S. viminalis
Ku7	S. schwerinii
Ku8	S. viminalis
Ku9	S. viminalis
Ku10	S. schwerinii
Ku11	S. dasyclados x S. viminalis L.
Ku12	S. dasyclados
Ku13	S. viminalis
Ku14	S. viminalis
Ku15	S. viminalis
Ku16	S. viminalis
Ku17	S. viminalis
Ku18	S. viminalis
Ku19	S. viminalis L. x S. schwerinii E. Wolf
Ku20	S. schwerinii
Ku21	S. viminalis
Ku22	S. viminalis L. x S. schwerinii E. Wolf
Ku23	S. viminalis
Ku24	S. viminalis
Ku25	S. viminalis
Ku26	S. schwerinii
Ku27	S. viminalis
Ku28	S. viminalis
Ku29	S. viminalis
Ku30	S. viminalis L. x S. schwerinii E. Wolf
M1	S. viminalis
M2	S. viminalis
M3	S. viminalis
M4	S. viminalis
M5	S. viminalis
M6	S. viminalis
M7	S. viminalis
M8	S. viminalis
M9	S. viminalis
M10	S. viminalis
M11	S. viminalis
M12	S. viminalis
M13	S. viminalis
M14	S. viminalis
M15	S. viminalis
M16	S. viminalis
M17	S. viminalis
M18	S. viminalis
M19	S. viminalis
M20	S. viminalis
M21	S. viminalis
M22	S. viminalis
M23	S. viminalis
M24	S. viminalis
M25	S. viminalis
M26	S. viminalis
M27	S. viminalis
M28	S. viminalis
M29	S. viminalis
M30	S. viminalis
N1	S. schwerinii
N2	S. viminalis
N3	S. viminalis
N4	S. viminalis
N5	S. schwerinii
N6	S. schwerinii
N7	S. viminalis
N8	S. schwerinii
N9	S. schwerinii
N10	S. viminalis
N11	S. viminalis
N12	S. schwerinii
N13	S. schwerinii
N14	S. viminalis
N15	S. schwerinii x S. dasyclados or S. schwerinii x S. viminalis
N16	S. schwerinii
N17	S. viminalis
N18	S. viminalis
N19	S. viminalis
N20	S. viminalis
N21	S. schwerinii
N22	S. schwerinii
N23	S. schwerinii
N24	S. schwerinii
N25	S. schwerinii
N26	S. dasyclados
N27	S. viminalis
N28	S. viminalis
N29	S. schwerinii
N30	S. viminalis
P1	S. schwerinii
P2	S. schwerinii
P3	S. schwerinii
P4	S. schwerinii
P5	S. schwerinii
P6	S. schwerinii
P7	S. schwerinii
P8	S. schwerinii
P9	S. schwerinii
P10	S. schwerinii
P11	S. schwerinii
P12	S. schwerinii
P13	S. schwerinii
P14	S. schwerinii
P15	S. schwerinii
P16	S. schwerinii
P17	S. schwerinii
P18	S. schwerinii
P19	S. schwerinii
P20	S. schwerinii
P21	S. schwerinii
P22	S. schwerinii
P23	S. schwerinii
P24	S. schwerinii
P25	S. schwerinii x S. viminalis
S1	S. dasyclados
S2	S. viminalis
S3	S. dasyclados
S4	S. dasyclados
S5	S. viminalis
S6	S. viminalis x S.dasyclados
S7	S. viminalis
S8	S. viminalis
S9	S. viminalis
S10	S. viminalis
S11	S. viminalis
S12	S. viminalis
S13	S. viminalis
S14	S. viminalis x S.dasyclados
S15	S. dasyclados
S16	S. viminalis
S17	S. dasyclados
S18	S. dasyclados
S19	S. dasyclados
S20	S. dasyclados
S21	S. dasyclados
SB1	S. viminalis
SB2	S. viminalis x S.dasyclados
SB3	S. viminalis x S.dasyclados
SB4	S. viminalis
SB5	S. viminalis
SB6	S. viminalis
SB7	S. viminalis
SB8	S. schwerinii
SB9	S. dasyclados
SB10	S. dasyclados
SB11	S. viminalis
SB12	S. dasyclados
SB13	S. dasyclados
SB14	S. dasyclados
SB15	S. dasyclados
SB16	S. dasyclados x S. viminalis
SB17	S. viminalis x S.dasyclados
SB18	S. viminalis x S.dasyclados
SB19	S. schwerinii
SB20	S. viminalis
SB21	S. viminalis
SB22	S. dasyclados
SB23	S. viminalis
SB24	S. viminalis
SB25	S. dasyclados
SB27	S. viminalis
Т1	S. viminalis
Т2	S. viminalis
Т3	S. viminalis
Т4	S. viminalis
Т5	S. viminalis
Т6	S. viminalis
Т7	S. viminalis
Т8	S. viminalis
T9	S. viminalis
Т10	S. viminalis
Т11	S. viminalis
Т12	S. viminalis
T13	S. viminalis
T15	S. viminalis
Т16	S. viminalis
Т17	S. viminalis
Т18	S. viminalis
T19	S. viminalis
Т20	S. viminalis
Т21	S. viminalis
Т22	S. viminalis
T23	S. viminalis
Т24	S. viminalis
Т25	S. viminalis
Ta1	S. viminalis
Ta2	S. viminalis
Та3	S. viminalis
Та4	S. viminalis
Ta5	S. viminalis
Та6	S. viminalis
Та7	S. viminalis
Та8	S. viminalis
Ta9	S. viminalis
Та10	S. viminalis
Та11	S. viminalis
Та12	S. viminalis
Та13	S. viminalis
Та14	S. viminalis
Та15	S. viminalis
Ta16	S. viminalis
Та17	S. viminalis
Ta18	S. viminalis
Та19	S. viminalis
Та20	S. viminalis
Ta21	S. viminalis
Та22	S. viminalis
Та23	S. viminalis
Та24	S. viminalis
Та25	S. viminalis
Z1	S. viminalis
Z2	S. viminalis
Z3	S. viminalis
Z4	S. viminalis
Z5	S. dasyclados x S. viminalis
Z6	S. viminalis
Z7	S. viminalis
Z8	S. viminalis
Z9	S. viminalis
Z10	S. viminalis
Z11	S. viminalis
Z12	S. viminalis
Z13	S. viminalis
Z14	S. viminalis
Z15	S. viminalis
Z16	S. viminalis
Z17	S. viminalis
Z18	S. viminalis
Z19	S. viminalis
Z20	S. viminalis
Z21	S. dasyclados x S. viminalis
Z22	S. viminalis
Z23	S. dasyclados x S. viminalis
Z24	S. viminalis
Z25	S. viminalis
